# Supplementary material for: Arbuscular Mycorrhizal Fungi and Biofilm Forming Bacteria Act Synergistically to Modulate Proline Metabolism, Antioxidant Defense System and Aquaporin Genes Expression Under Drought Stress
Source: Preprints.org preprint supplement (doi:10.20944/preprints202208.0133.v1), 2022-08-08
Supplement: Supplementary file 1 [file supplementary]

	TableS3: Individual variances for different PCA's
	PC1	PC2	PC3	PC4	PC5	PC6	PC7	PC8	PC9	PC10	PC11	PC12	PC13	PC14	PC15	PC16	PC17	PC18	PC19	PC20
Individual	0.409579917	0.272459767	0.142023538	0.096076973	0.040484601	0.025287989	0.00470236	0.003960813	0.001762524	0.001434551	0.000927238	0.000425452	0.000314585	0.00029801	0.000110514	5.78E-05	4.81E-05	2.68E-05	1.85E-05	0
Cumulative	0.409579917	0.682039684	0.824063221	0.920140195	0.960624796	0.985912785	0.990615145	0.994575957	0.996338482	0.997773032	0.99870027	0.999125722	0.999440308	0.999738318	0.999848832	0.999906607	0.999954743	0.999981519	1	1
